# Supplementary material for: Culture Conditions for Human Induced Pluripotent Stem Cell-Derived Schwann Cells: A Two-Centre Study
Source: Int J Mol Sci. 2023 Mar 10;24(6):5366. doi: 10.3390/ijms24065366 (PMC10049204; doi:10.3390/ijms24065366)
Supplement: Supplementary file 1 [file ijms-24-05366-s001.zip › ijms-2194610-supplementary.pdf]

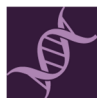

Article

**Culture Conditions for Human Induced Pluripotent Stem Cell-Derived Schwann Cells: A Two-Centre Study**

**Zhong Huang** <sup>1,2,†</sup>, **Rebecca Powell** <sup>3,†</sup>, **Svenja Kankowski** <sup>1</sup>, **James B. Phillips** <sup>3,4,\*</sup> and **Kirsten Haastert-Talini** <sup>1,2,\*</sup>

<sup>1</sup> Institute of Neuroanatomy and Cell Biology, Hannover Medical School (MHH), 30623 Hannover, Germany

<sup>2</sup> Center for Systems Neuroscience (ZSN) Hannover, 30559 Hannover, Germany

<sup>3</sup> Department of Pharmacology, University College London (UCL) School of Pharmacy, 29-39 Brunswick Square, London WC1N 1AX, UK

<sup>4</sup> UCL Centre for Nerve Engineering, UCL, London WC1H 0AL, UK

\* Correspondence: [jb.phillips@ucl.ac.uk](mailto:jb.phillips@ucl.ac.uk) (J.B.P.); [haastert-talini.kirsten@mh-hannover.de](mailto:haastert-talini.kirsten@mh-hannover.de) (K.H.-T.)

† These authors contributed equally to this work.

‡ These authors contributed equally to this work.

Supplementary Material

Table S1. Primary and secondary antibodies for immunocytochemistry at MHH; Table S2. Primary and secondary antibodies for immunocytochemistry at UCL; Table S3. MHH primer sequences for RT-Qpcr; Table S4. UCL primer sequences for RT-qPCR.

Figure S1. Characterization of hiPSC-SCPs morphology, mRNA and protein level when cultured in different cell densities and in different passages; Figure S2. Characterization of hiPSC-SCPs morphology, mRNA and protein level when cultured in different cell densities and in different passages; Figure S3. Microscopic comparison of hiPSC-SCs derived from the original and the MHH modified protocol; Figure S4. Phase contrast micrographs showing morphological change between high-density hiPSC-SCs, low density hiPSC-SCs and ahSCs; Figure S5. Phase contrast micrographs showing hiPSC-SCs plating density prior to hiPSC-SC differentiation and hiPSC-SC survival after 7 days; Figure S6. Morphology of hiPSC-SCs at DIV 15 in SCDM.

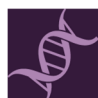

Table S1. Primary and secondary antibodies for immunocytochemistry *at MHH*.

| <b>Antibodies for immunocytochemistry</b> |                |                   |              |            |                       |
|-------------------------------------------|----------------|-------------------|--------------|------------|-----------------------|
| Antibodies                                | Dilution       | Species Raised    | Product code | Source     | Epitope               |
| GAP43                                     | 1:500          | Rabbit polyclonal | AB5220       | Abcam      | Cytoplasm             |
| CDH 19                                    | 1:200          | Rabbit polyclonal | PA5-101291   | Invitrogen | Cytoplasm             |
| SOX10                                     | 1:100          | Mouse monoclonal  | MAB2864      | R&D        | Nucleus/<br>Cytoplasm |
| p75 <sup>NTR</sup>                        | 1:200          | Mouse monoclonal  | AB3125       | Abcam      | Extracellular         |
| S100B                                     | 1:200          | Rabbit polyclonal | Z0311        | Dako       | Cytoplasm             |
| GFAP                                      | 1:400          | Rabbit polyclonal | G-9269       | Sigma      | Cytoplasm             |
| GALC                                      | 1:500 or 1:200 | Rabbit polyclonal | G9152        | Sigma      | Extracellular         |

Table S2. Primary and secondary antibodies for immunocytochemistry *at UCL*.

| <b>Antibodies for immunocytochemistry – second modified protocol</b> |          |                   |              |                            |                       |
|----------------------------------------------------------------------|----------|-------------------|--------------|----------------------------|-----------------------|
| Antibodies                                                           | Dilution | Species Raised    | Product code | Source                     | Epitope               |
| OCT4                                                                 | 1:200    | Goat polyclonal   | sc-8629      | Santa Cruz Biotechnology   | Nucleus               |
| SOX10                                                                | 1:40     | Mouse monoclonal  | sc-365692    | Santa Cruz Biotechnology   | Nucleus/<br>Cytoplasm |
| p75 <sup>NTR</sup>                                                   | 1:200    | Rabbit monoclonal | 8238         | Cell Signalling Technology | Extracellular         |
| S100B                                                                | 1:1      | Rabbit polyclonal | GA50461-2    | Dako                       | Cytoplasm             |
| DAPI                                                                 | 1:1000   | Fluorescent dye   | D9542        | Sigma                      | Nucleus               |
| DyLight 488 Anti-Mouse IgG                                           | 1:200    | Horse polyclonal  | DI-2488      | VectorLabs                 | Secondary             |
| DyLight 549 Anti-Rabbit IgG                                          | 1:200    | Goat polyclonal   | DI-1549      | VectorLabs                 | Secondary             |
| DyLight 594 Anti-Goat IgG                                            | 1:200    | Horse polyclonal  | DI-3094      | VectorLabs                 | Secondary             |

Table S3. *MHH* primer sequences for RT-qPCR.

| Gene          | Forward primer (5' to 3') | Reverse primer (5' to 3') | Expected amplicon size (bp) |
|---------------|---------------------------|---------------------------|-----------------------------|
| <i>RPLP0</i>  | TGGTCTCTTTGACTAATCACC     | AGAAGTAAGCCTTTATTTCTT     | 80                          |
| <i>SNAI2</i>  | CTGGACACACATACAGTGATTA    | CGGTAGTCCACACAGTGAT       | 121                         |
| <i>TFAP2A</i> | GCAGTAGCTGAATTTCTCAAC     | CTCTTTGCATATCTGTTTGTGA    | 96                          |
| <i>CDH19</i>  | GTAATAGACATCGCTACTGGAA    | GATAACTAATGTTCTTCTGGA     | 15-                         |
| <i>NGFR</i>   | ACAACCTCATCCCTGTCTAT      | AGCTGTTCCACCTCTTGA        | 87                          |
| <i>S100B</i>  | GAGACAAGGAAGAGGATGTC      | TAAGAAATGGGAAAGCTCAT      | 150                         |
| <i>PMP22</i>  | AAATTCTTGCTGGTCTGTG       | GTAGGAGTAATCCGAGTTGAG     | 89                          |
| <i>SOX10</i>  | GAGAGGGCTCCCCATGTCAGA     | GCCCCACTGCAGCTCTGTCTTC    | 104                         |
| <i>c-Jun</i>  | ACAATAGGTGCTTATTCTCAA     | CTAGGAATTGTCAAAGAGAAGA    | 94                          |
| <i>PLP1</i>   | GAGAAAAAGTAAAAGACCGAAG    | ACTCTAACAAGCCCATGTC       | 135                         |
| <i>GAP43</i>  | CTGAAGAGAACATAGAAGCTGT    | AAAGCCATTCTTAGAGTTCA      | 122                         |

Table S4. *UCL* primer sequences for RT-qPCR.

| Gene          | Forward primer (5' to 3') | Reverse primer (5' to 3') | Expected amplicon size (bp) |
|---------------|---------------------------|---------------------------|-----------------------------|
| <i>RPS18</i>  | CAAGAGGGCGGGAGAAC         | CGTGGATTCTGCATAATGGTG     | 66                          |
| <i>TBP</i>    | ACTTCGTGCCCCGAAACG        | GTGGTTCGTGGCTCTCTTATC     | 78                          |
| <i>SNAI2</i>  | CCAAACTACAGCGAAC          | TGAGGATCTCTGGTTG          | 97                          |
| <i>TFAP2A</i> | GAAGCTGTCCACCTAGC         | CTTGGCAGGAAATTCGG         | 61                          |
| <i>CDH19</i>  | CTTGCTTGAGCAACAG          | ATCTTAGCTGGCCGATG         | 150                         |
| <i>NGFR</i>   | GTGAGTGCTGCAAAG           | AACGTCACGCTGTC            | 97                          |
| <i>S100B</i>  | CTCATCAACAATGAGCTTTC      | TCACATTCGCCGTCTC          | 104                         |
| <i>PMP22</i>  | GACACGCAACTGATCTC         | TGCAGCCATTGTTTTG          | 91                          |
| <i>SOX10</i>  | TACACCGACCAGCCATC         | GGTCAGAGTAGTCAAACCTGG     | 109                         |
| <i>c-Jun</i>  | CCTGATAATCCAGTCC          | ATCTGTCACGTTCTTG          | 82                          |
| <i>PLP1</i>   | ACCTGCCAGTCTATTG          | TGGGAGAACACCATAC          | 87                          |
| <i>GAP43</i>  | AGCTCATAAGGCCGCAAC        | TCAGCAGCTTGGACATCATC      | 99                          |
| <i>SOX2</i>   | GCTCGCAGACCTACATGAAC      | ACTTGACCACCGAACCC         | 102                         |

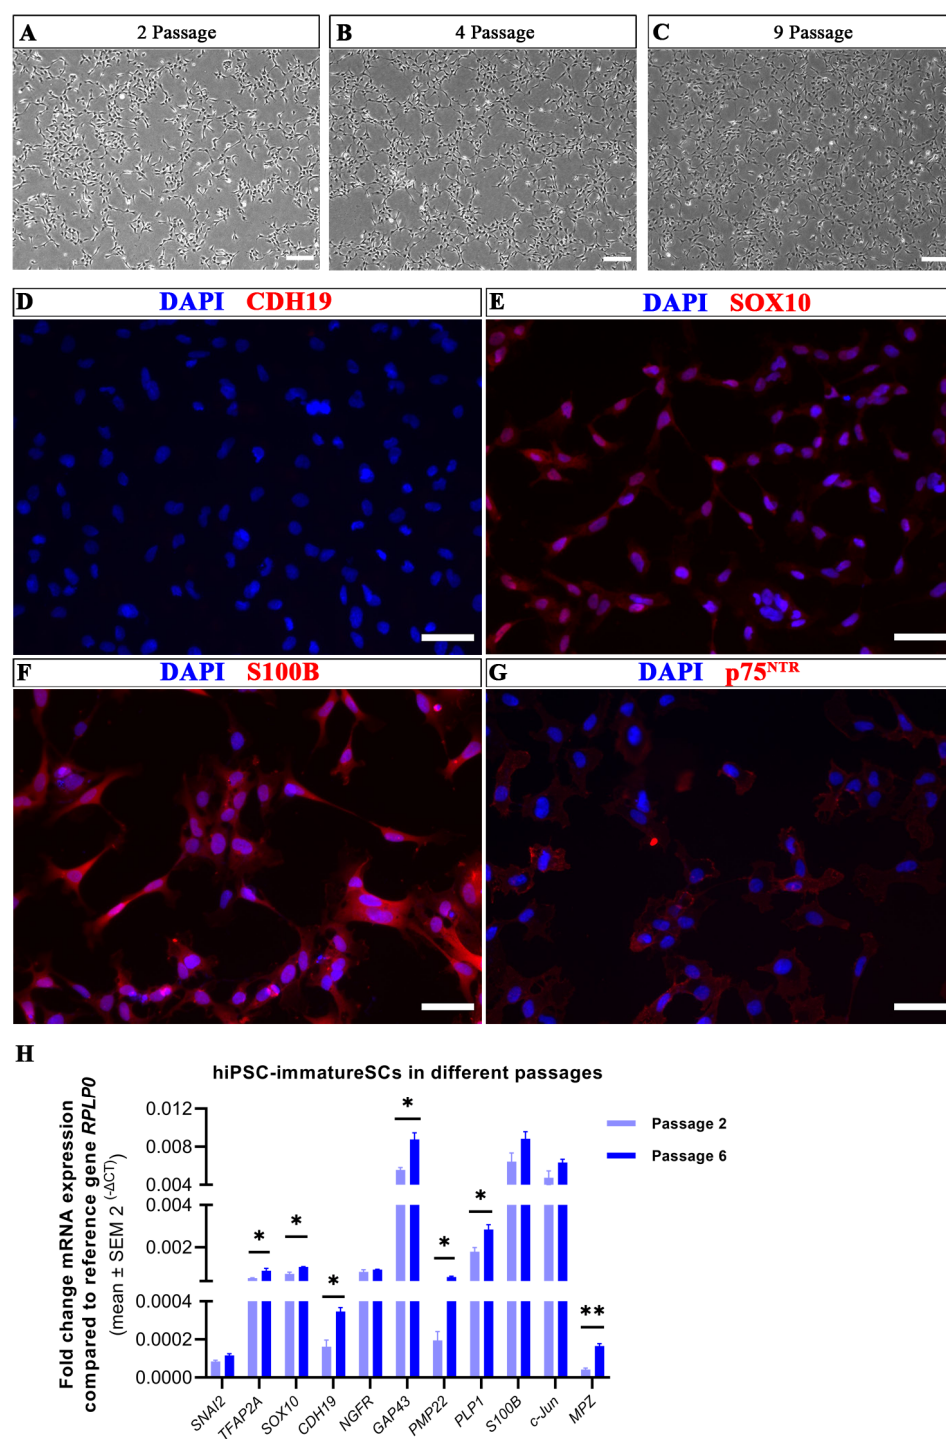

**Figure S1.** Characterization of MHH hiPSC-immatureSCs morphology, mRNA and protein level when cultured in different passages. (A-C) Representative phase-contrast photomicrographs of cells cultured at passage 2, 4, and 9 with an initial cell density of  $2 \times 10^5$ . (D-G) Immunocytochemical characterization of hiPSC-immatureSCs from passages 2-9, cells are negative for CDH19 (D) and positive for Schwann cell markers SOX10 (E), S100B (F), and p75<sup>NTR</sup> (G); cell nuclei were stained with DAPI (blue). (H) Graphical presentation of gene expression analysis of hiPSC-immatureSCs at passage 2 and passage 6 with gene *SNAI2*, *TFAP2A*, *SOX10*, *CDH19*, *NGFR*, *GAP43*, *PMP22*, *PLP1*, *S100B*, *c-Jun*, and *MPZ*. Values were normalized to the reference gene *RPLP0*; Statistical analysis with unpaired t-test, \*  $P < 0.05$ , \*\*  $P < 0.01$ ,  $n = 3$  cell cultures. (A-C) scale bar: 200  $\mu\text{m}$ . (D-G) Scale bar: 50  $\mu\text{m}$ ; hiPSC-immatureSCs = human induced Pluripotent Stem Cell derived immature Schwann Cells.

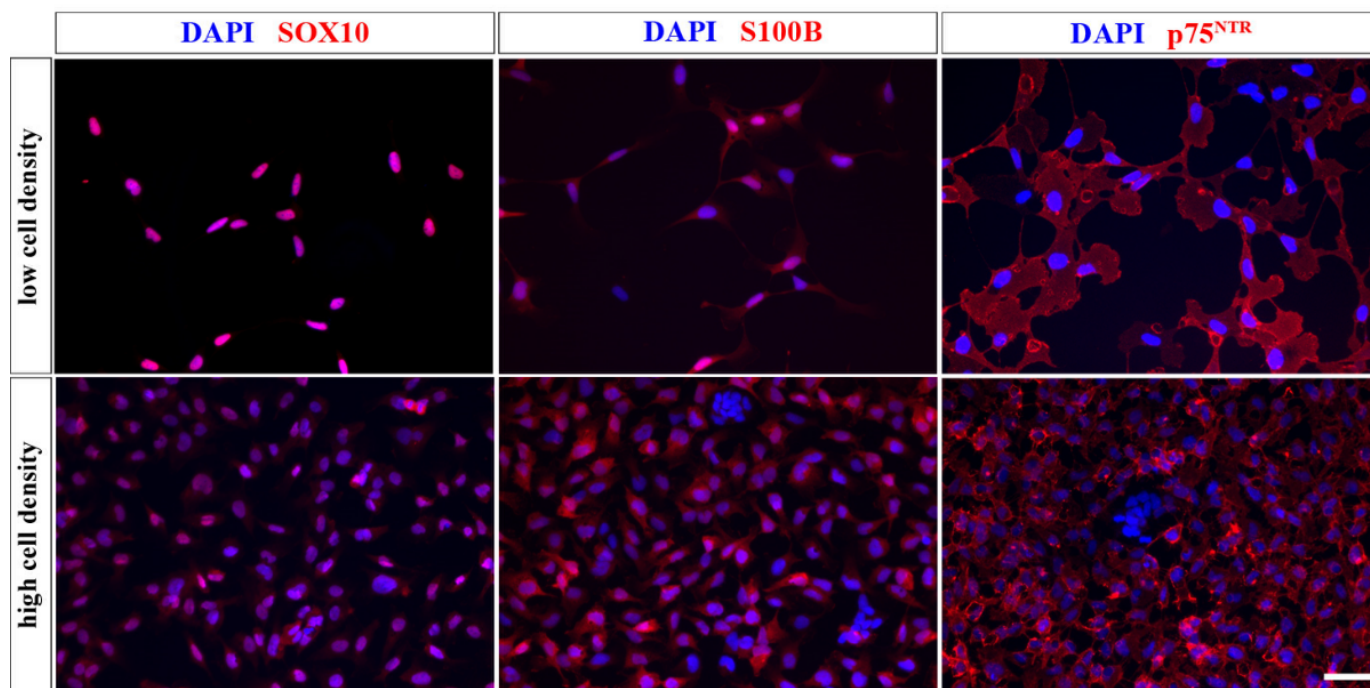

**Figure S2.** Morphology changes of hiPSC-immatureSCs cultured with different cell densities. Low cell density stands for a seeding density of  $2.5 \times 10^4$  cells / 24-well, and high cell density stands for a seeding density of  $5 \times 10^4$  cells / 24-well. The cells in both cultures were immunopositive for SOX10, S100B, and p75<sup>NTR</sup>. Cell nuclei were stained with DAPI (Blue). Scale bar: 50  $\mu$ m. hiPSC-immatureSCs = human induced Pluripotent Stem Cell derived immature Schwann Cells.

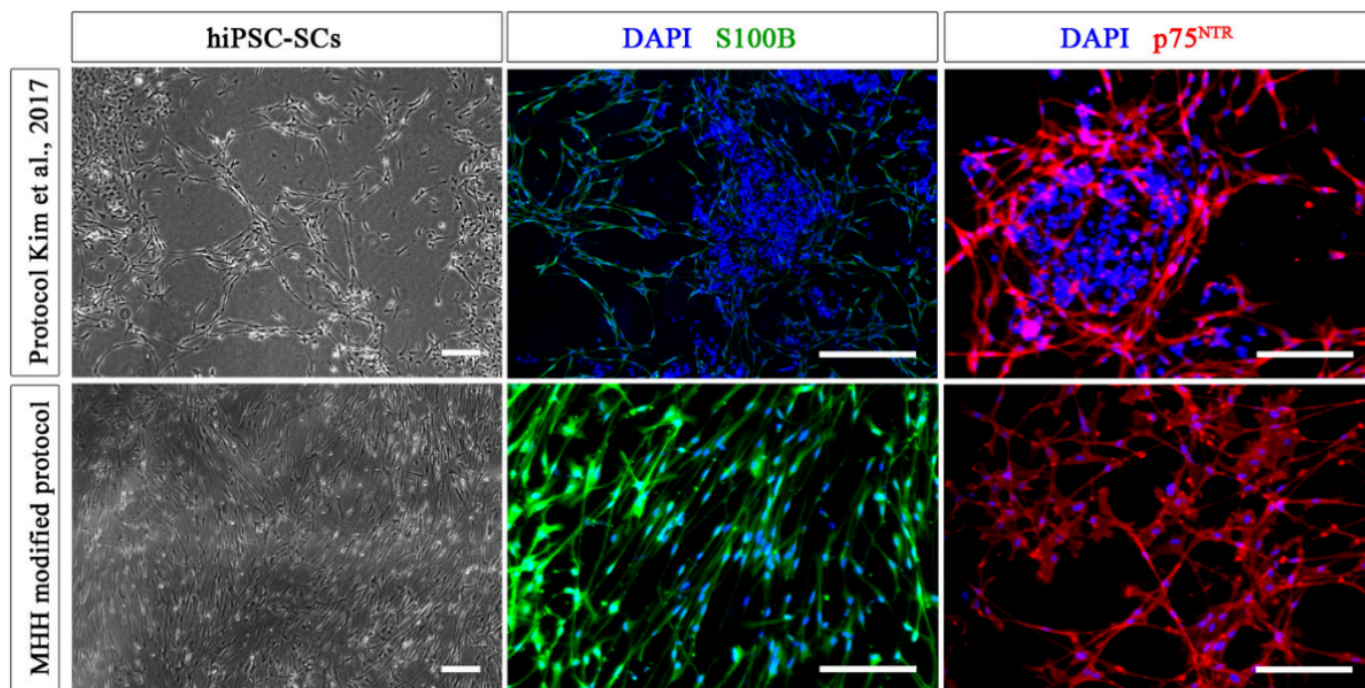

**Figure S3.** Microscopic comparison of hiPSC-SCs derived from the original and the MHH modified protocol. Phase-contrast photomicrographs represent hiPSC-SCs differentiated by using the unmodified protocol according to [25] and the MHH modified

protocol. Immunocytochemical staining was performed to detect Schwann cell markers S100B and p75<sup>NTR</sup>. Cell nuclei were stained with DAPI (Blue). Scale bar: 200  $\mu$ m. hiPSC-SCs = human induced Pluripotent Stem Cell derived Schwann Cells.

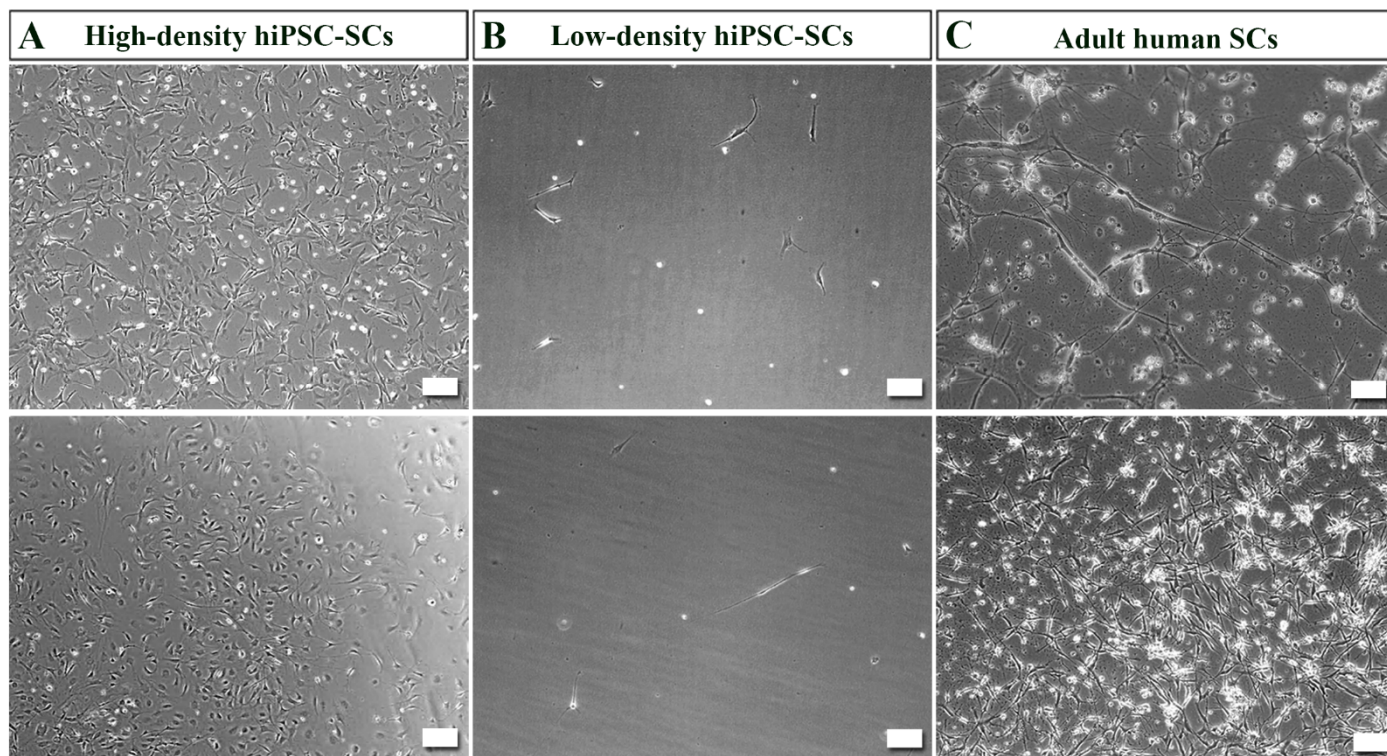

**Figure S4.** Phase contrast micrographs showing morphological change between high-density hiPSC-SCs (A), low-density hiPSC-SCs (B) and adult human Schwann cells cultured at UCL (C). Low cell density stands for a seeding density of 1763 cells / cm<sup>2</sup>, and high cell density stands for a seeding density of 14101 cells / cm<sup>2</sup>. Adult human Schwann cells in (C) were seeded in a density of  $3.7 \times 10^4$  cells / cm<sup>2</sup>. Upper and lower panels show examples from two differentiation procedures for the differentiated Schwann cells while the adult human Schwann cells images are from two separate flasks from one cell line. Low density plating produces cells more closely resembling the primary Schwann cell culture, being longer and more bipolar in shape. Scale bar = 100  $\mu$ m. hiPSC-SCs were differentiated from hiPSC-SCPs for 7 days in SCDM. hiPSC-SCPs = human induced Pluripotent Stem Cell derived Schwann Cell Precursor cells; hiPSC-SCs = human induced Pluripotent Stem Cell derived Schwann Cells.

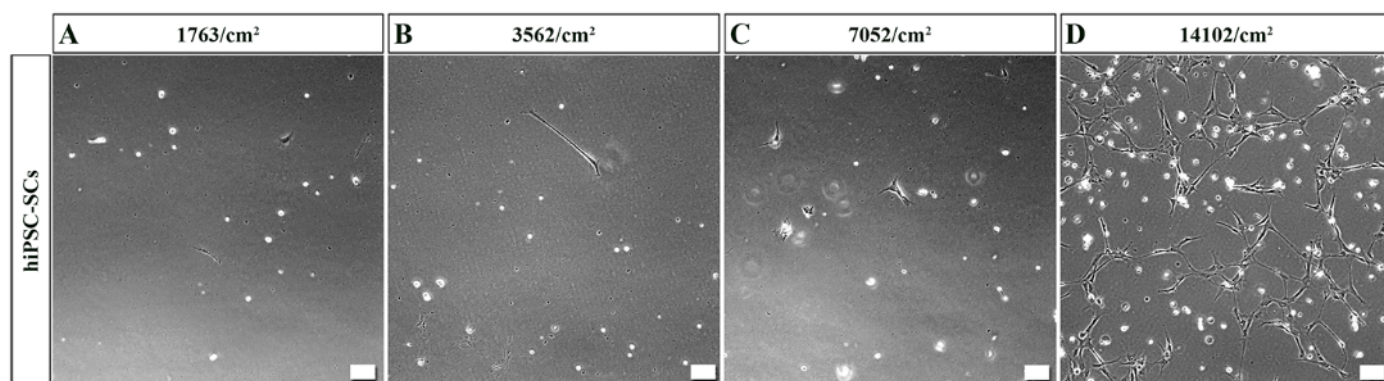

**Figure S5.** Phase contrast micrographs showing UCL hiPSC-SCPs plating density prior to hiPSC-SC differentiation and hiPSC-SC survival after 7 days. (A) 1763/cm<sup>2</sup>; (B) 3526/cm<sup>2</sup>; (C) 7052/cm<sup>2</sup>; (D): 14102/cm<sup>2</sup>; Scale bar = 100µm. Survival of hiPSC-SCs may be increased by increasing plating density of hiPSC-SCPs 8-fold. hiPSC-SCPs = human induced Pluripotent Stem Cell derived Schwann Cell Precursor cells.

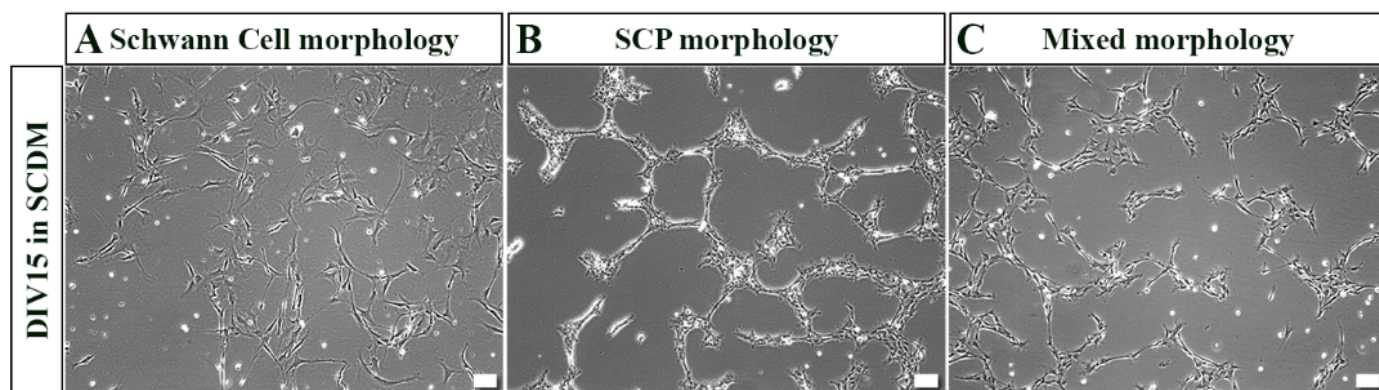

**Figure S6.** Morphology of UCL hiPSC-SCs at DIV 15 in UCL-SCDM. Differing morphologies can be seen with the long, bipolar morphology seen in Schwann cells evident in (A). (B) shows cells closer in morphology to the hiPSC-SCPs (dense, small and closely associated with one another) while (C) shows a mixture of these cell types. The changes in gene expression seen between DIV 7 and DIV 15 in figure 9 (RT-qPCR results) could be due to mixed populations of cell types appearing by DIV 15. UCL-SCDM = Schwann cell differentiation medium as used by the UCL team. Scale bar = 100µm.
